# Supplementary material
Source: HighWire-hosted journal article supplement (http://www.jneurosci.org/highwire/filestream/600125/field_highwire_adjunct_files/1/Figure_S2.pdf)
Supplement: Figure_S2.pdf [file Figure_S2.pdf]

ED-1

P2X7R-EGFP

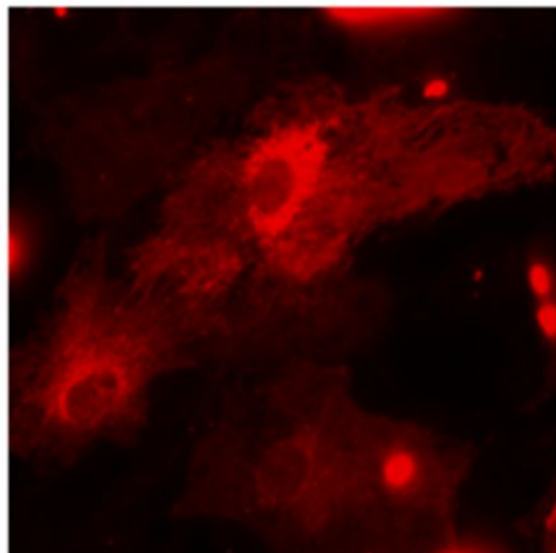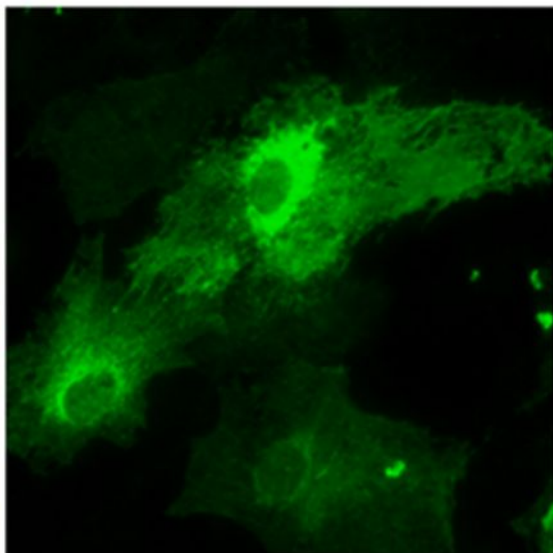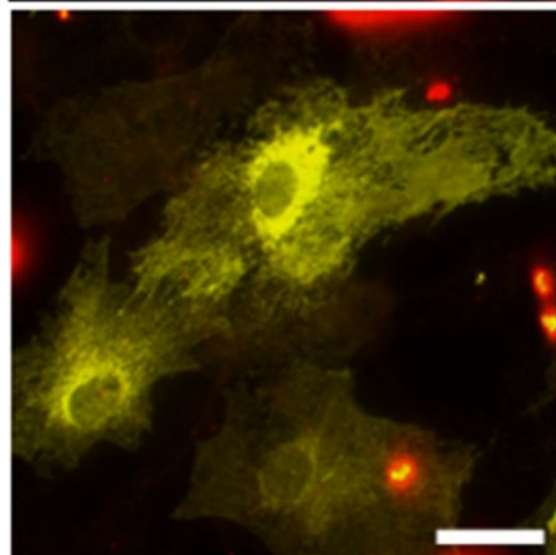

Merge

*Supplementary Figure 2: P2X7R-EGFP fluorescence co-localized with a marker of activated microglia, ED-1. Green = P2X7R-EGFP, Red = ED-1. Scale bar 10 $\mu$ m.*
